# Supplementary material for: Intra-tumoral delivery of functional ID4 protein via PCL/maltodextrin nano-particle inhibits prostate cancer growth
Source: PubMed Central journal article supplement (PMC5340093; doi:10.18632/oncotarget.10953), 2016-07-30
Supplement: oncotarget-07-68072-s001.pdf [file oncotarget-07-68072-s001.pdf]

## Intra-tumoral delivery of functional ID4 protein via PCL/maltodextrin nano-particle inhibits prostate cancer growth

### SUPPLEMENTARY FIGURE

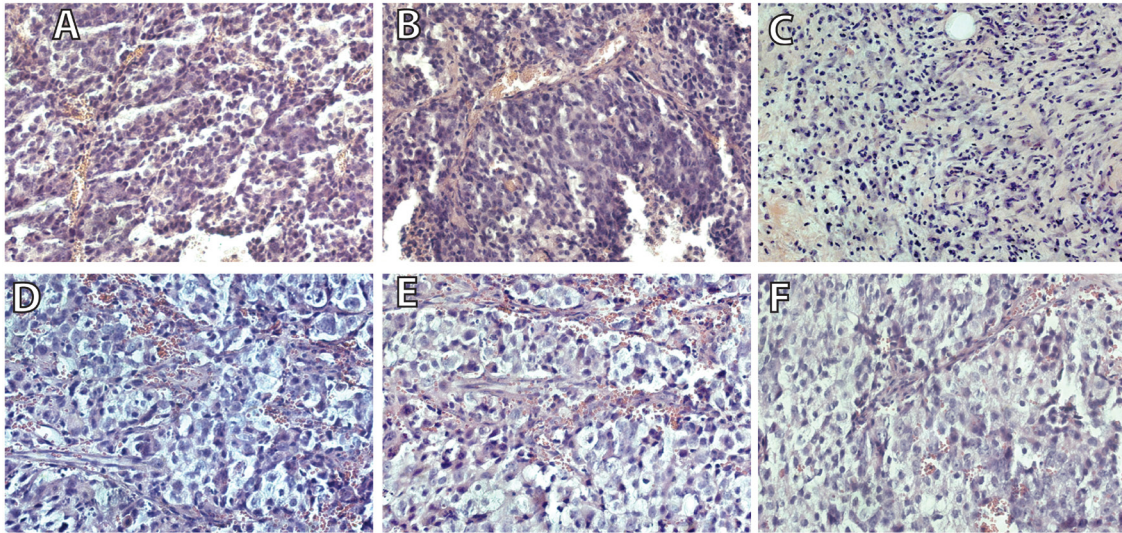

**Supplementary Figure S1: Histological analysis of tumors following excision.** The 5um sections were stained with H&E. **A.** L(-)ID4, **B.** L(-)ID4+NC, **C.** L(-)ID4+ID4NC, **D.** L(-)ID4+ DTX, **E.** L(-)ID4+NC+ DTX and **F.** L(-)ID4+ID4NC+ DTX. Representative images are shown.
